# Supplementary material
Source: PubMed Central journal article supplement (PMC3948036)
Supplement: ehp.1307234.s001.pdf [file ehp.1307234.s001.pdf]

**Supplemental Material**  
**Urinary Polycyclic Aromatic Hydrocarbons and Childhood  
Obesity: NHANES (2001–2006)**

Franco Scinicariello and Melanie C. Buser

**Supplemental Material, Table S1.** Multivariate linear regression beta coefficient (95% CI) association between BMI z-score, waist circumference and PAHs.<sup>a</sup>

|                               | 6-19 years                 | 6-11 years                | 12-19 years                |
|-------------------------------|----------------------------|---------------------------|----------------------------|
| <b>OUTCOME: BMI z-Score</b>   |                            |                           |                            |
| <b>1-naphthol (ng/L)</b>      |                            |                           |                            |
| Q 1: ≤ 690.86                 | Referent                   | Referent                  | Referent                   |
| Q 2: 690.87 - 1318.24         | 0.06 (-0.08, 0.21) p=0.36  | 0.05 (-0.13, 0.23) p=0.58 | 0.11 (-0.10, 0.31) p=0.31  |
| Q 3: 1318.25 - 3201.00        | 0.16 (-0.00, 0.32) p>0.05  | 0.22 (-0.07, 0.51) P=0.13 | 0.14 (-0.07, 0.36) p=0.19  |
| Q 4: > 3201.00                | 0.14 (-0.02, 0.30) p=0.09  | 0.16 (-0.13, 0.46) p=0.26 | 0.17 (-0.07, 0.42) p=0.16  |
| <b>2-naphthol (ng/L)</b>      |                            |                           |                            |
| Q 1: ≤ 1338.02                | Referent                   | Referent                  | Referent                   |
| Q 2: 1338.03 - 2409.16        | 0.24 (0.06, 0.43) p=0.01   | 0.40 (0.17, 0.64) p<0.01  | 0.14 (-0.14, 0.43) p=0.31  |
| Q 3: 2409.17 - 4633.60        | 0.29 (0.14, 0.45) p<0.01   | 0.43 (0.18, 0.68) p<0.01  | 0.20 (-0.03, 0.43) p=0.08  |
| Q 4: > 4633.60                | 0.38 (0.23, 0.54) p<0.01   | 0.59 (0.34, 0.84) p<0.01  | 0.24 (-0.04, 0.51) p=0.09  |
| <b>2-fluorene (ng/L)</b>      |                            |                           |                            |
| Q 1: ≤ 137.34                 | Referent                   | Referent                  | Referent                   |
| Q 2: 137.35 - 254.33          | 0.00 (-0.14, 0.14) p=0.98  | 0.10 (-0.10, 0.31) p=0.32 | -0.04 (-0.23, 0.16) p=0.71 |
| Q 3: 254.33 - 425.40          | 0.12 (-0.07, 0.30) p=0.21  | 0.23 (-0.06, 0.53) p=0.12 | 0.08 (-0.17, 0.32) p=0.53  |
| Q 4: > 425.40                 | 0.11 (-0.11, 0.33) p=0.34  | 0.23 (-0.14, 0.59) p=0.23 | 0.08 (-0.20, 0.35) p=0.57  |
| <b>3-fluorene (ng/L)</b>      |                            |                           |                            |
| Q 1: ≤ 55.94                  | Referent                   | Referent                  | Referent                   |
| Q 2: 55.95 - 100.87           | 0.05 (-0.11, 0.21) p=0.53  | 0.06 (-0.14, 0.27) p=0.52 | 0.10 (-0.10, 0.31) p=0.31  |
| Q 3: 100.88 - 178.88          | 0.08 (-0.09, 0.24) p=0.36  | 0.15 (-0.10, 0.40) p=0.23 | 0.04 (-0.16, 0.25) p=0.67  |
| Q 4: > 178.88                 | -0.03 (-0.23, 0.18) p=0.80 | 0.09 (-0.23, 0.41) p=0.57 | -0.02 (-0.31, 0.26) p=0.87 |
| <b>1-phenanthrene (ng/L)</b>  |                            |                           |                            |
| Q 1: ≤ 77.07                  | Referent                   | Referent                  | Referent                   |
| Q 2: 77.08 - 136.45           | 0.19 (0.03, 0.36) p=0.02   | 0.28 (0.07, 0.49) p=0.01  | 0.16 (-0.03, 0.34) p=0.10  |
| Q 3: 136.46 - 241.26          | 0.18 (-0.02, 0.39) p=0.08  | 0.18 (-0.16, 0.52) p=0.29 | 0.24 (0.02, 0.45) p=0.04   |
| Q 4: > 241.26                 | 0.28 (0.01, 0.54) p=0.04   | 0.29 (-0.12, 0.70) p=0.16 | 0.34 (0.04, 0.64) p=0.03   |
| <b>2-phenanthrene (ng/L)</b>  |                            |                           |                            |
| Q 1: ≤ 28.16                  | Referent                   | Referent                  | Referent                   |
| Q 2: 28.17 - 53.16            | 0.06 (-0.13, 0.24) p=0.54  | 0.08 (-0.13, 0.29) p=0.46 | 0.10 (-0.12, 0.32) p=0.36  |
| Q 3: 53.17 - 92.74            | 0.28 (0.07, 0.49) p=0.01   | 0.37 (0.09, 0.64) p=0.01  | 0.25 (-0.03, 0.54) p=0.08  |
| Q 4: > 92.74                  | 0.34 (0.06, 0.62) p=0.02   | 0.33 (0.01, 0.66) p=0.04  | 0.39 (0.02, 0.76) p=0.04   |
| <b>3-phenanthrene (ng/L)</b>  |                            |                           |                            |
| Q 1: ≤ 60.06                  | Referent                   | Referent                  | Referent                   |
| Q 2: 60.07 - 106.24           | 0.04 (-0.14, 0.21) p=0.67  | 0.10 (-0.12, 0.31) p=0.37 | 0.02 (-0.19, 0.24) p=0.83  |
| Q 3: 106.25 - 193.97          | 0.10 (-0.10, 0.30) p=0.33  | 0.15 (-0.14, 0.44) P=0.30 | 0.09 (-0.18, 0.37) p=0.50  |
| Q 4: > 193.97                 | 0.02 (-0.25, 0.28) p=0.90  | 0.02 (-0.33, 0.37) p=0.92 | 0.08 (-0.27, 0.43) p=0.65  |
| <b>1-pyrene (ng/L)</b>        |                            |                           |                            |
| Q 1: ≤ 50.18                  | Referent                   | Referent                  | Referent                   |
| Q 2: 50.19 - 98.83            | 0.13 (-0.04, 0.30) p=0.13  | 0.24 (-0.01, 0.49) p=0.06 | 0.08 (-0.13, 0.29) p=0.47  |
| Q 3: 98.84 - 187.17           | 0.02 (-0.15, 0.18) p=0.84  | 0.05 (-0.20, 0.31) p=0.69 | 0.04 (-0.16, 0.24) p=0.68  |
| Q 4: > 187.17                 | 0.01 (-0.19, 0.21) p=0.92  | 0.12 (-0.23, 0.47) p=0.50 | 0.00 (-0.27, 0.28) p=0.99  |
| <b>∑mol3-4 PAHs (nmol/L):</b> |                            |                           |                            |
| Q 1: ≤ 2.37                   | Referent                   | Referent                  | Referent                   |
| Q 2: 2.38 - 4.19              | 0.01 (-0.18, 0.20) p=0.94  | 0.12 (-0.12, 0.36) p=0.31 | -0.04 (-0.25, 0.17) p=0.71 |
| Q 3: 4.20 - 6.99              | 0.07 (-0.12, 0.27) p=0.44  | 0.19 (-0.15, 0.53) p=0.27 | 0.04 (-0.15, 0.23) p=0.69  |
| Q 4: > 6.99                   | 0.05 (-0.12, 0.27) p=0.65  | 0.20 (0.18, 0.58) p=0.30  | 0.02 (-0.27, 0.32) p=0.87  |

|                                     | 6-19 years                 | 6-11 years                 | 12-19 years                |
|-------------------------------------|----------------------------|----------------------------|----------------------------|
| <b>OUTCOME: Waist circumference</b> |                            |                            |                            |
| <b>1-naphthol (ng/L)</b>            |                            |                            |                            |
| Q 1: ≤ 690.86                       | Referent                   | Referent                   | Referent                   |
| Q 2: 690.87 - 1318.24               | -0.48 (-1.98, 1.03) p=0.53 | -0.10 (-1.96, 1.76) p=0.92 | -0.23 (-2.31, 1.85) p=0.83 |
| Q 3: 1318.25 - 3201.00              | 0.47 (-0.78, 1.71) p=0.46  | 0.96 (-1.60, 3.51) p=0.46  | 0.63 (-1.29, 2.55) p=0.51  |
| Q 4: > 3201.00                      | 0.22 (-1.48, 1.92) p=0.80  | 0.84 (-1.44, 3.13) p=0.46  | 0.94 (-1.59, 3.48) p=0.46  |
| <b>2-naphthol (ng/L)</b>            |                            |                            |                            |
| Q 1: ≤ 1338.02                      | Referent                   | Referent                   | Referent                   |
| Q 2: 1338.03 - 2409.16              | 1.60 (-0.07, 3.27) p=0.06  | 2.44 (0.19, 4.70) p=0.03   | 1.48 (-1.10, 4.06) p=0.25  |
| Q 3: 2409.17 - 4633.60              | 2.47 (1.02, 3.92) p<0.01   | 3.23 (1.05, 5.40) p<0.01   | 2.81 (0.58, 5.03) p=0.01   |
| Q 4: > 4633.60                      | 2.67 (1.10, 4.24) p<0.01   | 4.23 (1.74, 6.72) p<0.01   | 2.63 (0.04, 5.22) p<0.05   |
| <b>2-fluorene (ng/L)</b>            |                            |                            |                            |
| Q 1: ≤ 137.34                       | Referent                   | Referent                   | Referent                   |
| Q 2: 137.35 - 254.33                | 0.73 (-0.89, 2.36) p=0.37  | 1.29 (-0.70, 3.29) p=0.20  | 0.84 (-1.37, 3.06) p=0.45  |
| Q 3: 254.33 - 425.40                | 1.39 (-0.56, 3.33) p=0.16  | 0.98 (-1.62, 3.59) p=0.45  | 2.32 (-0.83, 5.47) p=0.14  |
| Q 4: > 425.40                       | 1.37 (-1.36, 4.10) p=0.32  | 1.70 (-1.75, 5.15) p=0.33  | 2.21 (-1.25, 5.67) p=0.20  |
| <b>3-fluorene (ng/L)</b>            |                            |                            |                            |
| Q 1: ≤ 55.94                        | Referent                   | Referent                   | Referent                   |
| Q 2: 55.95 - 100.87                 | 1.10 (-0.39, 2.59) p=0.14  | 1.64 (-0.26, 3.53) p=0.09  | 1.69 (-0.33, 3.70) p=0.10  |
| Q 3: 100.88 - 178.88                | 0.50 (-1.81, 2.80) p=0.67  | 0.87 (-1.31, 3.05) p=0.42  | 0.44 (-2.66, 3.54) p=0.78  |
| Q 4: > 178.88                       | -0.98 (-3.46, 1.50) p=0.43 | 0.11 (-2.56, 2.79) p=0.93  | -0.43 (-3.61, 2.75) p=0.79 |
| <b>1-phenanthrene (ng/L)</b>        |                            |                            |                            |
| Q 1: ≤ 77.07                        | Referent                   | Referent                   | Referent                   |
| Q 2: 77.08 - 136.45                 | 0.66 (-1.13, 2.44) p=0.46  | 1.04 (-1.02, 3.11) p=0.31  | 0.94 (-1.24, 3.12) p=0.39  |
| Q 3: 136.46 - 241.26                | 1.15 (-0.75, 3.05) p=0.23  | 1.56 (-1.15, 4.26) p=0.25  | 1.75 (-0.69, 4.20) p=0.16  |
| Q 4: > 241.26                       | 2.20 (-0.87, 5.26) p=0.16  | 0.98 (-2.47, 4.43) p=0.57  | 4.04 (0.24, 7.84) p=0.04   |
| <b>2-phenanthrene (ng/L)</b>        |                            |                            |                            |
| Q 1: ≤ 28.16                        | Referent                   | Referent                   | Referent                   |
| Q 2: 28.17 - 53.16                  | 0.06 (-1.75, 1.87) p=0.95  | -0.20 (-2.04, 1.64) p=0.83 | 1.15 (-1.15, 3.44) p=0.32  |
| Q 3: 53.17 - 92.74                  | 2.49 (0.36, 4.61) p=0.02   | 2.72 (0.09, 5.34) p=0.04   | 2.82 (-0.22, 5.86) p=0.07  |
| Q 4: > 92.74                        | 3.34 (0.17, 6.51) p=0.04   | 1.73 (-1.22, 4.68) p=0.24  | 5.21 (1.07, 9.35) p=0.01   |
| <b>3-phenanthrene (ng/L)</b>        |                            |                            |                            |
| Q 1: ≤ 60.06                        | Referent                   | Referent                   | Referent                   |
| Q 2: 60.07 - 106.24                 | 0.09 (-1.85, 2.02) p=0.93  | 0.72 (-1.73, 3.18) p=0.56  | -0.03 (-2.31, 2.24) p=0.98 |
| Q 3: 106.25 - 193.97                | 0.39 (-2.06, 2.84) p=0.75  | 1.10 (-1.74, 3.95) p=0.44  | 0.44 (-3.05, 3.93) p=0.80  |
| Q 4: > 193.97                       | -0.56 (-3.40, 2.27) p=0.69 | -0.65 (-4.19, 2.89) p=0.71 | 0.53 (-3.12, 4.18) p=0.77  |
| <b>1-pyrene (ng/L)</b>              |                            |                            |                            |
| Q 1: ≤ 50.18                        | Referent                   | Referent                   | Referent                   |
| Q 2: 50.19 - 98.83                  | 0.46 (-1.18, 2.10) p=0.57  | 0.29 (-2.39, 2.96) p=0.83  | 0.84 (-1.31, 2.98) p=0.44  |
| Q 3: 98.84 - 187.17                 | 0.08 (-2.05, 2.22) p=0.94  | -0.25 (-2.81, 2.30) p=0.84 | 1.10 (-1.39, 3.59) p=0.38  |
| Q 4: > 187.17                       | -0.99 (-3.27, 1.30) p=0.39 | -1.02 (-4.60, 2.55) p=0.57 | 0.00 (-2.90, 2.91) p=1.00  |
| <b>∑mol3-4 PAHs (nmol/L)</b>        |                            |                            |                            |
| Q 1: ≤ 2.37                         | Referent                   | Referent                   | Referent                   |
| Q 2: 2.38 - 4.19                    | 0.02 (-2.04, 2.08) p=0.98  | 0.42(-1.97, 2.81) p=0.73   | 0.37 (-2.29, 3.04) p=0.78  |
| Q 3: 4.20 - 6.99                    | 0.91 (-1.38, 3.21) p=0.43  | 1.11 (-1.98, 4.20) p=0.47  | 1.52 (-1.45, 4.50) p=0.31  |
| Q 4: > 6.99                         | -0.13 (-3.16, 2.89) p=0.93 | 0.09(-3.63, 3.81) p=0.96   | 1.00 (-2.90, 4.90) p=0.61  |

<sup>a</sup>**Adjusted** for age, race/ethnicity, gender, urinary creatinine, poverty income ratio (PIR), serum cotinine, serum c-reactive protein, calorie intake, and television, videogame and computer usage.

**Supplemental Material, Table S2.** Full multinomial logistic regression models of association between urinary PAHs and obesity and overweight versus normal/underweight. OR (95% CI).<sup>a</sup>

| Exposure                     | 6-19 years<br>Obese vs. normal | 6-19 years<br>Overweight vs. normal | 6-11 years<br>Obese vs. normal | 6-11 years<br>Overweight vs. normal | 12-19 years<br>Obese vs. normal | 12-19 years<br>Overweight vs.<br>normal |
|------------------------------|--------------------------------|-------------------------------------|--------------------------------|-------------------------------------|---------------------------------|-----------------------------------------|
| <b>1-naphthol (ng/L)</b>     |                                |                                     |                                |                                     |                                 |                                         |
| Q 1: ≤ 690.86                | 1.00                           | 1.00                                | 1.00                           | 1.00                                | 1.00                            | 1.00                                    |
| Q 2: 690.87 - 1318.24        | 1.32 (0.76, 2.29)              | 0.93 (0.55, 1.56)                   | 1.54 (0.73, 3.24)              | 1.41 (0.74, 2.68)                   | 1.32 (0.65, 2.65)               | 0.76 (0.37, 1.54)                       |
| Q 3: 1318.25 - 3201.00       | 1.45 (0.91, 2.31)              | 1.06 (0.68, 1.66)                   | 1.34 (0.60, 2.98)              | 1.62 (0.87, 3.04)                   | 1.62 (0.85, 3.08)               | 0.75 (0.44, 1.28)                       |
| Q 4: > 3201.00               | 1.72 (0.98, 3.01)              | 0.87 (0.55, 1.37)                   | 2.62 (1.12, 6.16)              | 1.57 (0.67, 3.68)                   | 1.63 (0.72, 3.67)               | 0.62 (0.38, 1.01)                       |
| <b>2-naphthol (ng/L)</b>     |                                |                                     |                                |                                     |                                 |                                         |
| Q 1: ≤ 1338.02               | 1.00                           | 1.00                                | 1.00                           | 1.00                                | 1.00                            | 1.00                                    |
| Q 2: 1338.03 - 2409.16       | 1.86 (1.10, 3.14)              | 1.40 (0.81, 2.43)                   | 1.49 (0.61, 3.63)              | 2.11 (1.07, 4.16)                   | 2.38 (1.20, 4.72)               | 1.07 (0.50, 2.25)                       |
| Q 3: 2409.17 - 4633.60       | 1.95 (1.17, 3.24)              | 1.36 (0.94, 1.96)                   | 2.18 (0.90, 5.28)              | 1.65 (0.93, 2.94)                   | 2.05 (1.06, 3.94)               | 1.20 (0.66, 2.16)                       |
| Q 4: > 4633.60               | 2.03 (1.23, 3.33)              | 1.34 (0.78, 2.31)                   | 2.30 (1.08, 4.89)              | 1.70 (0.68, 4.25)                   | 2.20 (1.02, 4.77)               | 1.14 (0.53, 2.43)                       |
| <b>2-fluorene (ng/L)</b>     |                                |                                     |                                |                                     |                                 |                                         |
| Q 1: ≤ 137.34                | 1.00                           | 1.00                                | 1.00                           | 1.00                                | 1.00                            | 1.00                                    |
| Q 2: 137.35 - 254.33         | 1.11 (0.70, 1.75)              | 0.69 (0.39, 1.23)                   | 1.11 (0.57, 2.16)              | 0.64 (0.26, 1.54)                   | 1.21 (0.66, 2.22)               | 0.78 (0.35, 1.72)                       |
| Q 3: 254.33 - 425.40         | 1.40 (0.77, 2.54)              | 0.76 (0.43, 1.31)                   | 1.03 (0.42, 2.54)              | 1.00 (0.39, 2.57)                   | 1.90 (0.83, 4.33)               | 0.68 (0.36, 1.28)                       |
| Q 4: > 425.40                | 1.13 (0.59, 2.19)              | 0.87 (0.47, 1.60)                   | 1.12 (0.40, 3.14)              | 1.15 (0.39, 3.41)                   | 1.46 (0.60, 3.55)               | 0.79 (0.39, 1.62)                       |
| <b>3-fluorene (ng/L)</b>     |                                |                                     |                                |                                     |                                 |                                         |
| Q 1: ≤ 55.94                 | 1.00                           | 1.00                                | 1.00                           | 1.00                                | 1.00                            | 1.00                                    |
| Q 2: 55.95 - 100.87          | 1.88 (1.26, 2.80)              | 0.73 (0.44, 1.23)                   | 1.41 (0.74, 2.69)              | 0.55 (0.27, 1.13)                   | 2.66 (1.58, 4.47)               | 1.03 (0.50, 2.14)                       |
| Q 3: 100.88 - 178.88         | 1.20 (0.67, 2.15)              | 0.88 (0.55, 1.40)                   | 1.19 (0.47, 3.03)              | 1.02 (0.53, 1.98)                   | 1.22 (0.57, 2.61)               | 0.80 (0.39, 1.65)                       |
| Q 4: > 178.88                | 0.87 (0.50, 1.51)              | 0.74 (0.42, 1.29)                   | 0.82 (0.34, 1.97)              | 0.80 (0.33, 1.96)                   | 1.16 (0.54, 2.47)               | 0.76 (0.34, 1.72)                       |
| <b>1-phenanthrene (ng/L)</b> |                                |                                     |                                |                                     |                                 |                                         |
| Q 1: ≤ 77.07                 | 1.00                           | 1.00                                | 1.00                           | 1.00                                | 1.00                            | 1.00                                    |
| Q 2: 77.08 - 136.45          | 0.98 (0.57, 1.69)              | 1.09 (0.65, 1.83)                   | 1.32 (0.60, 2.86)              | 1.18 (0.61, 2.28)                   | 0.83 (0.45, 1.54)               | 1.18 (0.66, 2.13)                       |
| Q 3: 136.46 - 241.26         | 1.06 (0.62, 1.79)              | 1.02 (0.60, 1.73)                   | 0.91 (0.36, 2.34)              | 1.04 (0.45, 2.38)                   | 1.23 (0.63, 2.41)               | 1.09 (0.56, 2.15)                       |
| Q 4: > 241.26                | 1.22 (0.60, 2.49)              | 1.18 (0.69, 2.01)                   | 0.79 (0.25, 2.50)              | 1.70 (0.63, 4.54)                   | 1.73 (0.71, 4.24)               | 1.07 (0.57, 2.02)                       |

| <b>Exposure</b>                  | <b>6-19 years<br/>Obese vs. normal</b> | <b>6-19 years<br/>Overweight vs. normal</b> | <b>6-11 years<br/>Obese vs. normal</b> | <b>6-11 years<br/>Overweight vs. normal</b> | <b>12-19 years<br/>Obese vs. normal</b> | <b>12-19 years<br/>Overweight vs.<br/>normal</b> |
|----------------------------------|----------------------------------------|---------------------------------------------|----------------------------------------|---------------------------------------------|-----------------------------------------|--------------------------------------------------|
| <b>2-phenanthrene (ng/L)</b>     |                                        |                                             |                                        |                                             |                                         |                                                  |
| Q 1: ≤ 28.16                     | 1.00                                   | 1.00                                        | 1.00                                   | 1.00                                        | 1.00                                    | 1.00                                             |
| Q 2: 28.17 - 53.16               | 1.11 (0.60, 2.07)                      | 1.04 (0.72, 1.52)                           | 1.34 (0.62, 2.91)                      | 0.78 (0.42, 1.45)                           | 0.96 (0.44, 2.09)                       | 1.42 (0.81, 2.50)                                |
| Q 3: 53.17 - 92.74               | 1.55 (0.81, 2.95)                      | 1.30 (0.73, 2.33)                           | 1.72 (0.60, 4.99)                      | 1.33 (0.55, 3.22)                           | 1.56 (0.66, 3.67)                       | 1.38 (0.68, 2.81)                                |
| Q 4: > 92.74                     | 1.71 (0.83, 3.54)                      | 1.48 (0.87, 2.52)                           | 1.44 (0.49, 4.27)                      | 1.66 (0.72, 3.85)                           | 2.07 (0.82, 5.26)                       | 1.56 (0.79, 3.09)                                |
| <b>3-phenanthrene (ng/L)</b>     |                                        |                                             |                                        |                                             |                                         |                                                  |
| Q 1: ≤ 60.06                     | 1.00                                   | 1.00                                        | 1.00                                   | 1.00                                        | 1.00                                    | 1.00                                             |
| Q 2: 60.07 - 106.24              | 0.88 (0.47, 1.64)                      | 0.85 (0.51, 1.43)                           | 1.20 (0.46, 3.12)                      | 1.01 (0.48, 2.12)                           | 0.74 (0.37, 1.50)                       | 0.76 (0.38, 1.52)                                |
| Q 3: 106.25 - 193.97             | 0.82 (0.40, 1.67)                      | 0.80 (0.50, 1.29)                           | 1.18 (0.40, 3.47)                      | 0.97 (0.42, 2.23)                           | 0.71 (0.29, 1.73)                       | 0.70 (0.37, 1.32)                                |
| Q 4: > 193.97                    | 0.63 (0.28, 1.40)                      | 0.85 (0.49, 1.47)                           | 0.67 (0.17, 2.69)                      | 1.29 (0.53, 3.17)                           | 0.68 (0.27, 1.75)                       | 0.63 (0.31, 1.29)                                |
| <b>1-pyrene (ng/L)</b>           |                                        |                                             |                                        |                                             |                                         |                                                  |
| Q 1: ≤ 50.18                     | 1.00                                   | 1.00                                        | 1.00                                   | 1.00                                        | 1.00                                    | 1.00                                             |
| Q 2: 50.19 - 98.83               | 1.14 (0.68, 1.91)                      | 1.58 (0.95, 2.61)                           | 1.47 (0.65, 3.29)                      | 1.56 (0.67, 3.65)                           | 1.05 (0.54, 2.04)                       | 1.57 (0.82, 2.99)                                |
| Q 3: 98.84 - 187.17              | 0.77 (0.45, 1.30)                      | 1.24 (0.71, 2.18)                           | 0.73 (0.30, 1.76)                      | 1.40 (0.64, 3.06)                           | 0.92 (0.49, 1.70)                       | 1.17 (0.64, 2.15)                                |
| Q 4: > 187.17                    | 0.69 (0.37, 1.30)                      | 1.17 (0.70, 1.96)                           | 0.75 (0.24, 2.35)                      | 1.86 (0.60, 5.79)                           | 0.74 (0.36, 1.50)                       | 0.92 (0.47, 1.79)                                |
| <b>∑mol3-4 PAHs<br/>(nmol/L)</b> |                                        |                                             |                                        |                                             |                                         |                                                  |
| Q 1: ≤ 2.37                      | 1.00                                   | 1.00                                        | 1.00                                   | 1.00                                        | 1.00                                    | 1.00                                             |
| Q 2: 2.38 - 4.19                 | 0.84 (0.47, 1.51)                      | 0.77 (0.43, 1.39)                           | 0.77 (0.37, 1.59)                      | 0.79 (0.34, 1.87)                           | 0.93 (0.48, 1.80)                       | 0.85 (0.37, 1.94)                                |
| Q 3: 4.20 - 6.99                 | 1.09 (0.60, 2.00)                      | 0.85 (0.54, 1.35)                           | 1.18 (0.40, 3.49)                      | 0.89 (0.43, 1.85)                           | 1.14 (0.53, 2.44)                       | 0.89 (0.48, 1.64)                                |
| Q 4: > 6.99                      | 0.70 (0.32, 1.53)                      | 0.81 (0.47, 1.38)                           | 0.69 (0.21, 2.24)                      | 0.94 (0.35, 2.54)                           | 0.84 (0.33, 2.17)                       | 0.80 (0.39, 1.66)                                |

<sup>a</sup>Adjusted for age, race/ethnicity, gender, urinary creatinine, poverty income ratio (PIR), serum cotinine, serum c-reactive protein, calorie intake, and television, videogame and computer usage.
